# Supplementary material for: Relationship between a perioperative intravenous fluid administration strategy and acute kidney injury following off-pump coronary artery bypass surgery: an observational study
Source: PubMed Central journal article supplement (PMC4587764; doi:10.1186/s13054-015-1065-8), 2015-09-28
Supplement: 13054_2015_1065_MOESM1_ESM.pdf [file 13054_2015_1065_MOESM1_ESM.pdf]

**Relationship between a perioperative intravenous fluid administration strategy and acute kidney injury following off-pump coronary artery bypass surgery: an observational study**

Ji-Yeon Kim, M.D., Kyoung-Woon Joung, M.D., Kyung-Mi Kim, M.D., Min-Ju Kim, B.S.,  
Joon-Bum Kim, M.D., Sung-Ho Jung, M.D., Eun-Ho Lee, M.D., In-Cheol Choi, M.D.

**Supplementary Methods:** Patient management during study periods

**eTable 1:** Data adjusted with the use of inverse probability weighting.

**eTable 2:** Time of diagnosis of acute kidney injury after surgery.

**eTable 3:** Multivariable predictors for acute kidney injury after surgery.

**eTable 4:** Multivariable predictors for severe acute kidney injury ( $\geq$  KDIGO stage2) after surgery.

**eTable 5:** Multivariable predictors for persistent acute kidney injury after surgery.

**eTable 6:** Multivariable predictors for delayed extubation after surgery.

**eTable 7:** Multivariable predictors for prolonged length of stay in hospital after surgery.

**eTable 8:** Comparisons of results for primary analysis of acute kidney injury outcome compared with sensitivity analyses.

**eTable 9:** Unadjusted and adjusted relationships between perioperative cumulative amounts (ml/kg weight) of HES and postoperative acute kidney injury.

### **Supplementary Methods:** *Patient management during study periods*

Perioperative therapy for hemodynamic management and monitoring for OPCAB were conducted in the institutional standard manner. All preoperative medications, except for antiplatelet agents, diuretics, angiotensin-converting enzyme inhibitors, and angiotensin II receptor blockers, were continued until the morning of surgery. Before the induction of general anesthesia, an intra-arterial catheter was inserted into the radial artery under local anesthesia. A central venous catheter (MAC<sup>TM</sup>, Arrow International Inc, Reading, PA, USA) and a pulmonary artery catheter (Swan-Ganz CCombo<sup>®</sup> V CCO/SvO<sub>2</sub>/CEDV Thermodilution Catheter, Edwards Lifesciences LLC, Irvine, CA, USA) were inserted through the right internal jugular vein. Using a Vigilance<sup>®</sup> monitor (Edwards Lifesciences LLC, Irvine, CA, USA), cardiac output and mixed venous oxygen saturation were continuously measured, as were five-lead electrocardiography, pulse oxymetry, capnography, and urine output. Core temperature was kept above 36.0°C using a forced-air warming system.

During both study periods, the goals of anesthetic management during OPCAB were to maintain hemodynamic stability (mean arterial pressure > 65 mmHg, heart rate > 60 beats/min, central venous pressure of 8-12 mmHg, pulmonary capillary wedge pressure of 12-15 mmHg, urine output > 0.5 ml/kg/h, cardiac index > 2.0 L/min/m<sup>2</sup>, and mixed venous oxygen saturation > 70%). Standard hemodynamic management for OPCAB included mainly fluid administration to achieve normovolemia and preset hemodynamic goal in addition to vasopressors or inotropes to prevent excessive fluid administration. Intraoperative fluid management consisted of continuous infusion (4 ml/kg/h) of crystalloid (0.9% saline during control period or Plasma Solution-A during RPF period) as maintenance fluid and additional HES solution (Voluven<sup>®</sup> during control period or Volulyte<sup>®</sup> during RPF period) were administered for optimization of circulating blood volume. Postoperative fluid management consisted of continuous infusion of 5% dextrose as maintenance fluid and additional HES solution (Voluven<sup>®</sup> during control period or Volulyte<sup>®</sup> during RPF period) were administered to maintain normovolemia.

During control period, unlimited amount of HES solution was used during the perioperative period. However, during RPF period, if doses higher than the maximum cumulative dose (30 ml/kg) of HES solution were required, crystalloid (Plasma Solution-A during intraoperative period and 0.9% saline during postoperative period) or blood product was used as needed.

**eTable 1:** Data adjusted with the use of inverse probability weighting.

| Variable                             | Control group | RPF group  | <i>P</i> value |
|--------------------------------------|---------------|------------|----------------|
| Demographics                         |               |            |                |
| Age(yr)                              | 63.9 ± 9.3    | 64.2 ± 9.6 | 0.614          |
| Male gender                          | 429           | 174        | 0.310          |
| Clinical characteristics             |               |            |                |
| Body mass index (kg/m <sup>2</sup> ) | 24.6 ± 3.1    | 24.7 ± 2.8 | 0.656          |
| Euroscore (logistic)                 | 3.6 ± 3.8     | 3.7 ± 4.7  | 0.862          |
| Medical history                      |               |            |                |
| Diabetes mellitus                    | 250           | 87         | 0.232          |
| Hypertension                         | 364           | 132        | 0.271          |
| Smoker, current                      | 161           | 57         | 0.440          |
| Previous myocardial infarction       | 80            | 28         | 0.639          |
| Congestive heart failure             | 22            | 8          | 0.979          |
| s/p PTAC c stent                     | 115           | 50         | 0.484          |
| Cerebral vascular disease            | 138           | 55         | 0.843          |
| Peripheral vascular disease          | 56            | 23         | 0.887          |
| eGFR < 60 mL/min/1.73 m <sup>2</sup> | 81            | 29         | 0.663          |
| Liver disease                        | 19            | 4          | 0.201          |
| Left main disease                    | 125           | 53         | 0.550          |
| Coronary angiography < 5d            | 175           | 73         | 0.570          |
| Laboratory data                      |               |            |                |
| Hematocrit (%)                       | 38.6 ± 4.8    | 38.7 ± 5.6 | 0.772          |
| Creatinine (mg/dl)                   | 1.0 ± 0.4     | 1.0 ± 0.3  | 0.785          |
| Total bilirubin (mg/dl)              | 0.7 ± 0.3     | 0.8 ± 0.4  | 0.079          |
| Albumin (g/dl)                       | 3.8 ± 0.4     | 3.8 ± 0.5  | 0.443          |
| Uric acid (mg/dl)                    | 5.5 ± 1.5     | 5.6 ± 1.6  | 0.813          |
| Left ventricle ejection fraction (%) | 56.8 ± 9.8    | 57.3 ± 9.1 | 0.450          |
| Medication                           |               |            |                |
| ACEI or ARB                          | 253           | 82         | 0.054          |
| Beta blocker                         | 380           | 146        | 0.828          |
| Calcium channel blocker              | 400           | 164        | 0.226          |
| Insulin                              | 123           | 43         | 0.467          |

|                         |     |     |       |
|-------------------------|-----|-----|-------|
| Oral hypoglycemic agent | 204 | 76  | 0.727 |
| Statin                  | 448 | 185 | 0.080 |
| Aspirin                 | 438 | 178 | 0.258 |
| Plavix                  | 313 | 124 | 0.778 |
| Diuretics               | 105 | 43  | 0.740 |

---

Data are expressed as number of patients or mean  $\pm$  standard deviation.

RPF = renal-protective fluid management; EuroSCORE = European System for Cardiac Operative Risk Evaluation; PTCA c stent = percutaneous transluminal catheter angioplasty with stent insertion; eGFR = estimated glomerular filtration rate; ACEI = angiotensin-converting enzyme inhibitor; ARB = angiotensin receptor blocker.

**eTable 2:** Time of diagnosis of acute kidney injury after surgery.

|               | N   | < 48 h      | 48 h-7 days |
|---------------|-----|-------------|-------------|
| AKI           | 243 | 192 (79.0%) | 51 (21.0%)  |
| Control group | 210 | 168 (80.0%) | 42 (20.0%)  |
| RPF group     | 33  | 24 (72.7%)  | 9 (27.3%)   |
| Severe AKI    | 71  | 27 (38.0%)  | 44 (62.0%)  |
| Control group | 63  | 24 (38.1%)  | 39 (61.9%)  |
| RPF group     | 8   | 3 (37.5%)   | 5 (62.5%)   |
| RRT           | 14  | 10 (71.4%)  | 4 (28.6%)   |
| Control group | 12  | 8 (66.7%)   | 4 (33.3%)   |
| RPF group     | 2   | 2 (100%)    | 0 (0%)      |

AKI = acute kidney injury; RPF = renal-protective fluid management; RRT = renal replacement therapy.

**eTable 3:** Multivariable predictors for acute kidney injury after surgery.

| Predictor                                   | Odds Ratio | 95% CI      | <i>P</i> value |
|---------------------------------------------|------------|-------------|----------------|
| RPF group                                   | 0.310      | 0.191–0.504 | < 0.001        |
| Age (year)                                  | 1.023      | 1.002–1.044 | 0.032          |
| Diabetes mellitus                           | 1.605      | 1.124–2.291 | 0.009          |
| Hypertension                                | 1.551      | 1.055–2.278 | 0.025          |
| Coronary angiography < 5d                   | 1.786      | 1.232–2.588 | 0.002          |
| Preoperative hematocrit level (%)           | 0.959      | 0.920–0.999 | 0.047          |
| Preoperative serum creatinine level (mg/dl) | 2.312      | 1.413–3.786 | 0.001          |
| Preoperative serum albumin level (g/dl)     | 0.486      | 0.301–0.783 | 0.003          |
| Maximal SOFAc score $\geq$ 3                | 1.463      | 1.019–2.101 | 0.039          |
| Packed red blood cell (unit)*               | 1.207      | 1.085–1.343 | 0.001          |

\* used during surgery and within 48 hours postoperatively

CI = confidence interval; RPF = renal-protective fluid management; SOFAc = cardiovascular sequential organ failure assessment in the first 24 hours.

**eTable 4:** Multivariable predictors for severe acute kidney injury ( $\geq$  KDIGO stage2) after surgery.

| Predictor                                    | Odds Ratio | 95% CI      | <i>P</i> value |
|----------------------------------------------|------------|-------------|----------------|
| RPF group                                    | 0.301      | 0.121–0.745 | 0.009          |
| Preoperative hematocrit level (%)            | 0.901      | 0.846–0.959 | 0.001          |
| Preoperative serum albumin level (g/dl)      | 0.271      | 0.135–0.543 | < 0.001        |
| Preoperative uric acid concentration (mg/dl) | 1.256      | 1.058–1.491 | 0.009          |
| Maximal SOFAc score $\geq$ 3                 | 1.364      | 1.054–1.764 | 0.018          |
| Packed red blood cell (unit)*                | 1.278      | 1.138–1.436 | < 0.001        |

\* used during surgery and within 48 hours postoperatively

CI = confidence interval; RPF = renal-protective fluid management; SOFAc = cardiovascular sequential organ failure assessment in the first 24 hours.

**eTable 5:** Multivariable predictors for persistent acute kidney injury after surgery.

| Predictor                                   | Odds Ratio | 95% CI      | <i>P</i> value |
|---------------------------------------------|------------|-------------|----------------|
| RPF group                                   | 0.204      | 0.063–0.665 | 0.008          |
| Female                                      | 1.975      | 1.037–3.761 | 0.038          |
| age                                         | 1.059      | 1.021–1.099 | 0.002          |
| Preoperative serum creatinine level (mg/dl) | 3.316      | 1.856–5.926 | < 0.001        |
| Preoperative serum albumin level (g/dl)     | 0.383      | 0.188–0.782 | 0.008          |
| Packed red blood cell (unit)*               | 1.250      | 1.137–1.373 | < 0.001        |

\* used during surgery and within 48 hours postoperatively

CI = confidence interval; RPF = renal-protective fluid management.



**eTable 6:** Multivariable predictors for delayed extubation after surgery.

| Predictor                                   | Beta   | 95% CI         | <i>P</i> value |
|---------------------------------------------|--------|----------------|----------------|
| RPF group                                   | -0.275 | -0.366, -0.185 | < 0.001        |
| Female                                      | 0.148  | 0.042, 0.254   | 0.006          |
| Age                                         | 0.005  | 0.001, 0.010   | 0.048          |
| Body mass index                             | 0.016  | 0.003, 0.029   | 0.018          |
| Cerebrovascular disease                     | 0.112  | 0.015, 0.208   | 0.023          |
| EuroSCORE (logistic)                        | 0.018  | 0.006, 0.029   | 0.003          |
| Coronary angiography < 5d                   | 0.125  | 0.039, 0.212   | 0.005          |
| Preoperative serum creatinine level (mg/dl) | 0.154  | 0.035, 0.272   | 0.011          |
| Preoperative serum albumin level (g/dl)     | -0.136 | -0.243, -0.028 | 0.014          |
| Postoperative body weight gain (%)          | 0.037  | 0.006, 0.068   | 0.019          |
| Maximal SOFAc score $\geq$ 3                | 0.106  | 0.074, 0.137   | < 0.001        |

CI = confidence interval; RPF = renal-protective fluid management; EuroSCORE = European System for Cardiac Operative Risk Evaluation; SOFAc = cardiovascular sequential organ failure assessment in the first 24 hours.

**eTable 7:** Multivariable predictors for prolonged length of stay in hospital after surgery.

| Predictor                               | Beta   | 95% CI         | <i>P</i> value |
|-----------------------------------------|--------|----------------|----------------|
| RPF group                               | -0.108 | -0.167, -0.048 | < 0.001        |
| Hypertension                            | 0.083  | 0.026, 0.140   | 0.004          |
| EuroSCORE (logistic)                    | 0.014  | 0.007, 0.021   | < 0.001        |
| Preoperative diuretics use              | 0.109  | 0.037, 0.182   | 0.003          |
| Preoperative serum albumin level (g/dl) | -0.162 | -0.233, -0.091 | < 0.001        |
| Maximal SOFAc score $\geq$ 3            | 0.033  | 0.013, 0.054   | 0.002          |

CI = confidence interval; RPF = renal-protective fluid management; EuroSCORE = European System for Cardiac Operative Risk Evaluation; SOFAc = cardiovascular sequential organ failure assessment in the first 24 hours.

**eTable 8:** Comparisons of results for primary analysis of acute kidney injury outcome compared with sensitivity analyses.

|                                                                   | RPF strategy                 |                |
|-------------------------------------------------------------------|------------------------------|----------------|
|                                                                   | Adjusted Odds Ratio (95% CI) | <i>P</i> value |
| Primary model                                                     | 0.310 (0.191–0.504)          | < 0.001        |
| Adjusted for cerebrovascular disease                              | 0.318 (0.195–0.517)          | < 0.001        |
| Adjusted for liver disease                                        | 0.312 (0.192–0.508)          | < 0.001        |
| Adjusted for cerebrovascular disease and liver disease            | 0.313 (0.192–0.510)          | < 0.001        |
| Intraoperative variables only                                     | 0.265 (0.164–0.426)          | < 0.001        |
| Intraoperative variables only with Maximal SOFAc score            | 0.278 (0.173–0.449)          | < 0.001        |
| Intraoperative variables only with pRBC transfusion               | 0.308 (0.189–0.499)          | < 0.001        |
| subgroup with perioperative cumulative amounts of HES < 30 ml/kg* | 0.174 (0.102–0.298)          | < 0.001        |

All models except subgroup model are adjusted age, diabetes mellitus, hypertension, coronary angiography < 5d, preoperative hematocrit, preoperative serum creatinine, preoperative serum albumin, Maximal SOFAc score (except intraoperative variable model), and pRBC transfusion (except intraoperative variable model).

\* adjusted diabetes mellitus, hypertension, preoperative serum creatinine, preoperative serum albumin, Maximal SOFAc score, and pRBC transfusion.

RPF = renal-protective fluid management; CI = confidence interval; SOFAc = cardiovascular sequential organ failure assessment in the first 24 hours; pRBC = Packed red blood cell.

**eTable 9:** Unadjusted and adjusted relationships between perioperative cumulative amounts (ml/kg weight) of HES and postoperative acute kidney injury.

| Analysis                                      | Adjusted Odds Ratio (95% CI) | <i>P</i> Value |
|-----------------------------------------------|------------------------------|----------------|
| Unadjusted in overall population              | 1.013 (1.003–1.023)          | 0.008          |
| Multivariable adjusted in overall population* | 1.018 (1.006–1.030)          | 0.002          |
| Unadjusted in saline group                    | 0.989 (0.976–1.002)          | 0.106          |
| Multivariable adjusted in saline group†       | 0.988 (0.973–1.003)          | 0.106          |
| Unadjusted in RPF group                       | 0.990 (0.943–1.040)          | 0.696          |
| Multivariable adjusted in RPF group‡          | 0.987 (0.937–1.041)          | 0.634          |

\* adjusted diabetes mellitus, hypertension, logistic EuroSCORE, coronary angiography < 5d, preoperative hematocrit, preoperative serum creatinine, preoperative serum albumin, preoperative serum uric acid, diuretics use, anesthesia time, Maximal SOFAc score, and pRBC transfusion.

† adjusted diabetes mellitus, logistic EuroSCORE, coronary angiography < 5d, preoperative hematocrit, preoperative serum albumin, preoperative serum uric acid, and pRBC transfusion.

‡ adjusted age, preoperative serum creatinine, and Maximal SOFAc score.
